# Supplementary material for: Novel TMEM98, MFRP, PRSS56 variants in a large United States high hyperopia and nanophthalmos cohort
Source: PubMed Central journal article supplement (PMC7672112; doi:10.1038/s41598-020-76725-8), 2020-11-17
Supplement: 41598_2020_76725_MOESM1_ESM.pdf [file 41598_2020_76725_MOESM1_ESM.pdf]

# Novel *TMEM98*, *MFRP*, *PRSS56* variants in a large United States high hyperopia and nanophthalmos cohort

Lev Prasov<sup>1,2\*</sup>, Bin Guan<sup>3</sup>, Ehsan Ullah<sup>3</sup>, Steven M. Archer<sup>1</sup>, Bernadete M. Ayres<sup>1</sup>, Cagri G. Besirli<sup>1</sup>, Laurel Wiinikka-Buesser<sup>1</sup>, Grant M. Comer<sup>1</sup>, Monte A. Del Monte<sup>1</sup>, Susan G. Elner<sup>1</sup>, Sarah J. Garnai<sup>1</sup>, Laryssa A. Huryn<sup>3</sup>, Kayla Johnson<sup>1</sup>, Shivani S. Kamat<sup>1</sup>, Philip Lieu<sup>1</sup>, Shahzad I. Mian<sup>1</sup>, Christine A. Rygiel<sup>1</sup>, Jasmine Y. Serpen<sup>1,3,5</sup>, Hemant S. Pawar<sup>1</sup>, Brian P. Brooks<sup>3</sup>, Sayoko E. Moroi<sup>1,4</sup>, Julia E. Richards<sup>1</sup>, Robert B. Hufnagel<sup>3,\*</sup>

<sup>1</sup> Department of Ophthalmology and Visual Sciences, University of Michigan, Ann Arbor, MI 48105

<sup>2</sup> Department of Human Genetics, University of Michigan, Ann Arbor, MI 48109

<sup>3</sup> Ophthalmic Genetics and Visual Function Branch, National Eye Institute, National Institutes of Health, Bethesda, MD 20892

<sup>4</sup> Department of Ophthalmology and Visual Sciences, The Ohio State University, Columbus, OH 43212

<sup>5</sup> Case Western Reserve University School of Medicine, Cleveland, OH, 44106

\* Authors for correspondence:

Lev Prasov, MD, PhD

229 Kellogg Eye Center

1000 Wall St.

Ann Arbor, MI 48105

Tel 734-763-3732

[lprasov@med.umich.edu](mailto:lprasov@med.umich.edu)

Robert B. Hufnagel, MD, PhD

10 Center Drive

Bldg 10, rm 10N109

Bethesda, MD 20892

Tel 301-503-1305

[Robert.hufnagel@nih.gov](mailto:Robert.hufnagel@nih.gov)

**Running Title:** Small eye genetics

## Key Words:

Nanophthalmos

*TMEM98*

*MFRP*

*BEST1*

*CRB1*

Pooled exome sequencing

Angle closure glaucoma

Retinal pigment epithelium (RPE)

*PRSS56*

Small eye

Retinal degeneration

High hyperopia

Posterior microphthalmos

A

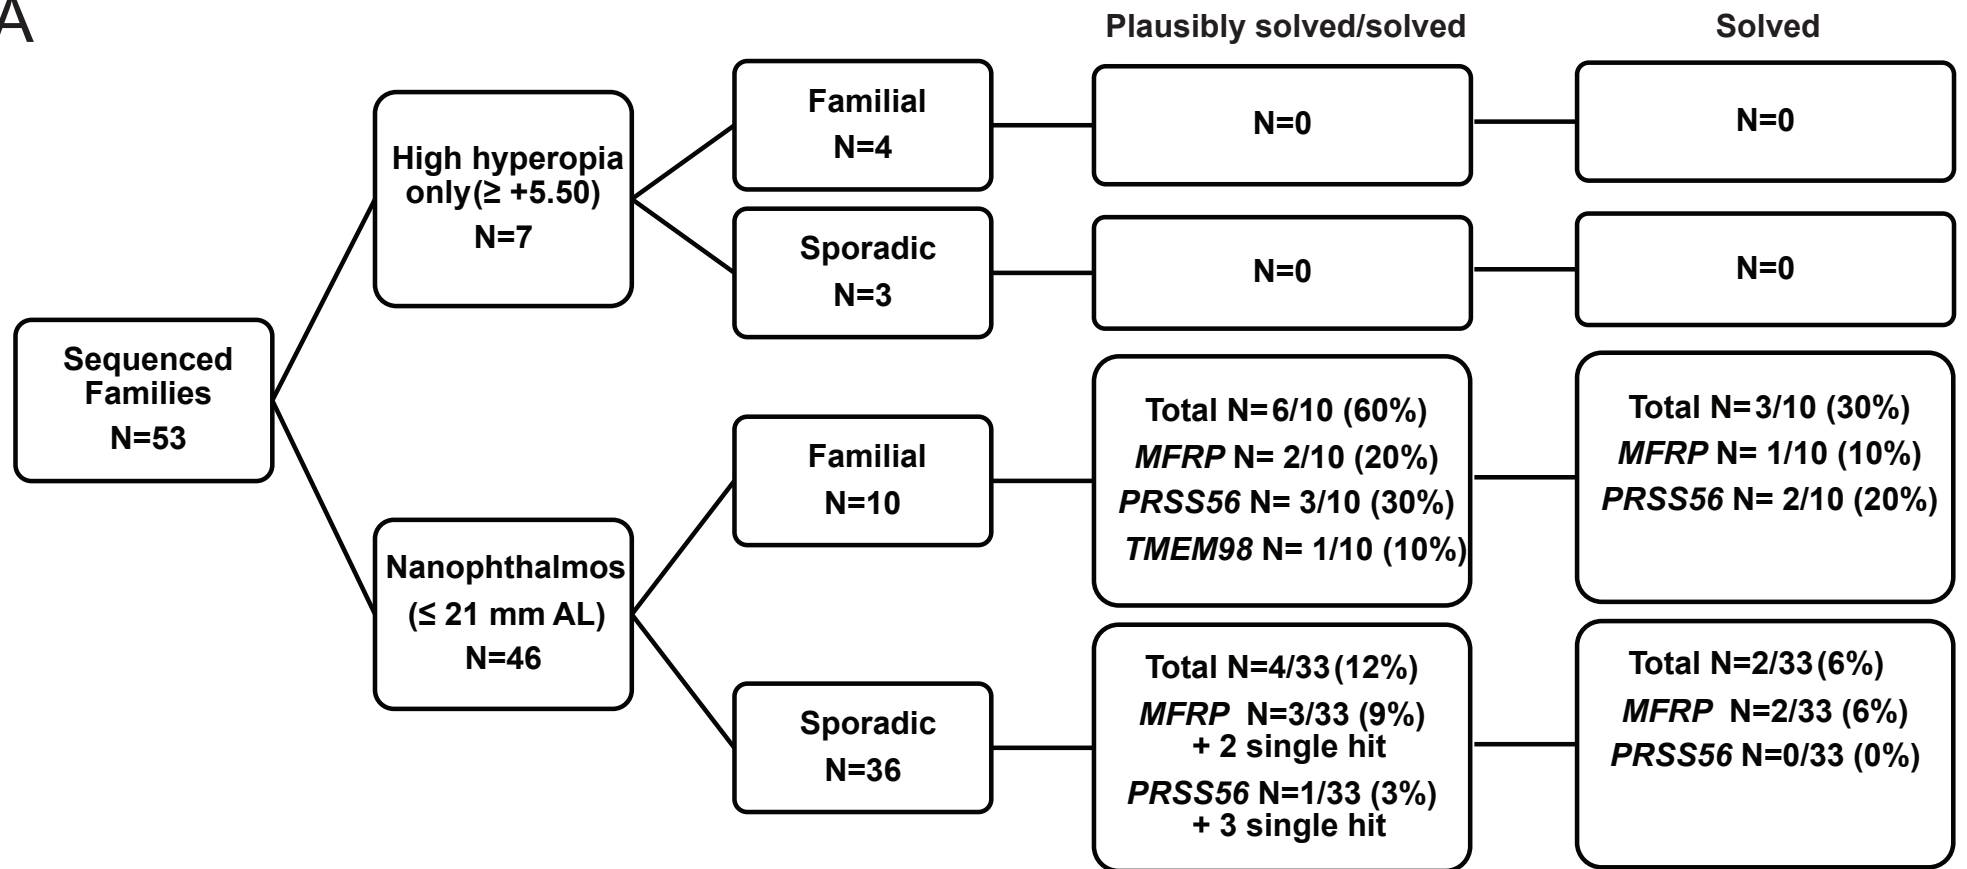

B

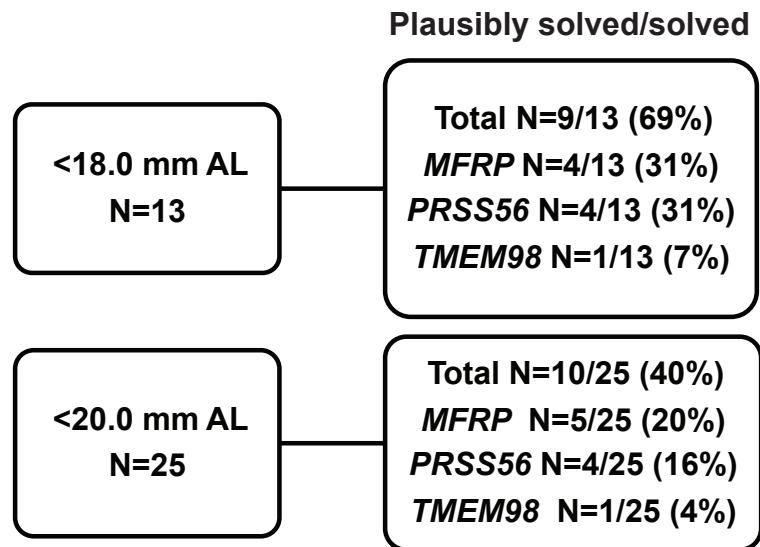

**Figure S1: Fractions of solved cases by genotype and phenotype.** A) Flowchart showing fractions of solved cases among high hyperopes, nanophthalmos sporadic and familial cases. B) Flowchart based on stringent definitions of nanophthalmos from prior reports. A high fraction of families was solved among those with the most significantly reduced axial lengths (<18 mm).

Table S1: Categorization of variant level data among nanophthalmos and high hyperopia cases

| hg19 variant ID    | Gene   | HGVSc                       | HGVSp               | gnomAD AF       | In-house total | In-house <i>in silico</i> score | <i>In silico</i> (Varsome)                                                                                                                                                                                                                                                  | <i>In silico</i> (Franklin, Aggregated Prediction) | ClinVar     | HGMD   | HGMD Publications | Zygosity | Segregation                      | ACMG Evidence                           | ACMG Class        | Reference                                                                                                                                                                                               |
|--------------------|--------|-----------------------------|---------------------|-----------------|----------------|---------------------------------|-----------------------------------------------------------------------------------------------------------------------------------------------------------------------------------------------------------------------------------------------------------------------------|----------------------------------------------------|-------------|--------|-------------------|----------|----------------------------------|-----------------------------------------|-------------------|---------------------------------------------------------------------------------------------------------------------------------------------------------------------------------------------------------|
| 11-119214525-C-A   | MFRP   | NM_031433.4:c.1124+1G>T     | NA                  | 0.0006065       | 17.1           | 2.5                             | dbcsSNV ADA 0.9999, RF 0.934                                                                                                                                                                                                                                                | splice AI Exome and Genome : Splice Altering (U    | Uncertain   | DM     | 2                 | Het      | in trans by whatsh               | PVS1, PM2                               | Likely Pathogenic | Siggs et al., 2020; Wang et al., 2014; Dinculescu et al., 2012                                                                                                                                          |
| 11-119214558-GGT-G | MFRP   | NM_031433.4:c.1090_1091delA | p.Thr364GlnfsTer27  | 0.00005221      | 11.5           | 0.5                             | NA                                                                                                                                                                                                                                                                          | NA                                                 | Absent      | Absent | NA                | Het      | phase not determ                 | PVS1, PM2                               | Likely Pathogenic | This study                                                                                                                                                                                              |
| 11-119214628-A-G   | MFRP   | NM_031433.4:c.1022T>C       | p.Leu341Pro         | 0.00002411      | 11             | 5                               | Pathogenic computational verdict because 6 pathogenic predictions from DANN, EIGEN, FATHMM-MKL, M-CAP, MutationAssessor and MutationTaster vs 3 benign predictions from DEOGEN2, MVP and REVEL.                                                                             | Uncertain (0.43)                                   | Absent      | Absent | NA                | Het      | in trans by familial segregation | PS4-moderate, PM2, PM3, PP3, PP1-strong | Pathogenic        | This study                                                                                                                                                                                              |
| 11-119215093-C-T   | MFRP   | NM_031433.4:c.907G>A        | p.Gly303Arg         | Absent          | 11             | 5                               | Pathogenic computational verdict because 6 pathogenic predictions from DANN, EIGEN, FATHMM-MKL, M-CAP, MutationAssessor and MutationTaster vs 3 benign predictions from DEOGEN2, MVP and REVEL.                                                                             | Uncertain (0.31)                                   | Absent      | Absent | NA                | Het      | NA                               | PM2, PP3                                | VUS               | This study                                                                                                                                                                                              |
| 11-119215387-A-G   | MFRP   | NM_031433.4:c.853T>C        | p.Cys285Arg         | 0.00003216      | 12             | 5                               | Pathogenic computational verdict because 11 pathogenic predictions from DANN, DEOGEN2, EIGEN, FATHMM-MKL, M-CAP, MVP, MutationAssessor, MutationTaster, PrimateAI, REVEL and SIFT vs no benign predictions.                                                                 | Deleterious (0.96)                                 | Absent      | Absent | NA                | Het      | in trans by whatsh               | PM2, PM3, PP3                           | VUS               |                                                                                                                                                                                                         |
| 11-119215716-T-C   | MFRP   | NM_031433.4:c.642-2A>G      | NA                  | 0.0001046       | 21.5           | 2.5                             | dbcsSNV ADA 0.9999, RF 0.9459                                                                                                                                                                                                                                               | splice AI Exome and Genome : Splice Altering (U    | Conflicting | Absent | NA                | Het      | phase not determ                 | PVS1, PM2                               | Likely Pathogenic | This study                                                                                                                                                                                              |
| 11-119216142-C-A   | MFRP   | NM_031433.4:c.629G>T        | p.Gly210Val         | 0.003819 (03 hr | 8              | 4                               | Benign computational verdict because 6 benign predictions from DEOGEN2, EIGEN, MVP, MutationAssessor, PrimateAI and REVEL vs 4 benign predictions from DANN, FATHMM-MKL, MutationTaster and SIFT and the position is not conserved (GERP++ rejected substitutions = 4.15 is | Benign (0.15)                                      | Conflicting | Absent | NA                | Het      | in trans by whatsh               | PM2, PP3, PP1-supporting                | VUS               | This study                                                                                                                                                                                              |
| 11-119216272-TG-T  | MFRP   | NM_031433.4:c.498delC       | p.Asn167ThrfsTer25  | 0.0001216       | 18.5           | 0.5                             | NA                                                                                                                                                                                                                                                                          | NA                                                 | Pathogen    | DM     | 7                 | Het      | in trans by familia              | PVS1, PS4, PM2, PP1-strong              | Pathogenic        | Almoallem et al., 2020; Bacci et al., 2020; Sundin et al., 2005; Kannabiran et al., 2012; Nen et al., 2012; Ritter et al., 2013; Zacharias et al., 2015; Guo et al., 2019; Morillo Sanchez et al., 2019 |
| 11-119216596-AG-A  | MFRP   | NM_031433.4:c.313delC       | p.Leu105CysfsTer32  | Absent          | 11             | 0                               | NA                                                                                                                                                                                                                                                                          | NA                                                 | Absent      | Absent | NA                | Het      | in trans by whatsh               | PVS1, PM2                               | Likely Pathogenic | This study                                                                                                                                                                                              |
| 17-31267932-G-C    | TMEM98 | NM_001033504.1:c.602G>C     | p.Arg201Pro         | Absent          | 8              | 5                               | Pathogenic computational verdict because 7 pathogenic predictions from DANN, EIGEN, FATHMM-MKL, M-CAP, MutationTaster, PrimateAI and SIFT vs 4 benign predictions from DEOGEN2, MVP, MutationAssessor and REVEL.                                                            | Uncertain(0.44)                                    | Absent      | Absent | NA                | Het      | NA                               | PM2, PP3, PP1-supporting                | VUS               | This study                                                                                                                                                                                              |
| 2-233386849-C-A    | PRSS56 | NM_001195129.1:c.425C>A     | p.Thr142Lys         | 0.0000417       | 10             | 3                               | Pathogenic computational verdict because 4 pathogenic predictions from DEOGEN2, FATHMM-MKL, M-CAP and MutationAssessor vs 3 benign predictions from DANN, MVP and PrimateAI.                                                                                                | NA                                                 | Absent      | Absent | NA                | Hom      | NA                               | PM2, PP3                                | VUS               | This study                                                                                                                                                                                              |
| 2-233387284-C-A    | PRSS56 | NM_001195129.1:c.506C>A     | p.Ala169Glu         | Absent          | 7              | 1                               | Benign computational verdict because 6 benign predictions from DANN, DEOGEN2, FATHMM-MKL, MVP, MutationAssessor and PrimateAI vs 1 pathogenic prediction from M-CAP and the position is not conserved (GERP++ rejected substitutions = 1.22 is less than 5.5).              | NA                                                 | Absent      | Absent | NA                | Hom      | NA                               | PM2, BP4                                | VUS               | This study                                                                                                                                                                                              |
| 2-233387526-G-A    | PRSS56 | NM_001195129.1:c.661G>A     | p.Ala221Thr         | Absent          | 8              | 1                               | Benign computational verdict because 6 benign predictions from DANN, DEOGEN2, FATHMM-MKL, MVP, MutationAssessor and PrimateAI vs 1 pathogenic prediction from M-CAP and the position is not conserved (GERP++ rejected substitutions = 2.42 is less than 5.5).              | NA                                                 | Absent      | Absent | NA                | Het      | NA                               | PM2                                     | VUS               | This study                                                                                                                                                                                              |
| 2-233387881-G-C    | PRSS56 | NM_001195129.1:c.818G>C     | p.Gly273Ala         | Absent          | 9.5            | 2.5                             | Pathogenic computational verdict because 5 pathogenic predictions from DEOGEN2, FATHMM-MKL, M-CAP, MutationAssessor and PrimateAI vs 2 benign predictions from DANN and MVP.                                                                                                | NA                                                 | Absent      | Absent | NA                | Het      | in trans by whatsh               | PM2, PP3                                | VUS               | This study                                                                                                                                                                                              |
| 2-233387913-G-T    | PRSS56 | NM_001195129.1:c.849+1G>T   | NA                  | 0.00008335      | 14             | 2                               | dbcsSNV ADA 0.9999, RF 0.924                                                                                                                                                                                                                                                | splice AI Exome and Genome : Splice Altering (U    | Absent      | Absent | NA                | Het      | in trans by whatsh               | PVS1, PM2, PM3-Strong                   | Pathogenic        | Siggs et al., 2020                                                                                                                                                                                      |
| 2-233388237-G-C    | PRSS56 | NM_001195129.1:c.961G>C     | p.Val321Leu         | Absent          | 9.5            | 2.5                             | Pathogenic computational verdict because 5 pathogenic predictions from DEOGEN2, FATHMM-MKL, M-CAP, MutationAssessor and PrimateAI vs 2 benign predictions from DANN and MVP.                                                                                                | NA                                                 | Absent      | Absent | NA                | Het      | in trans by whatsh               | PM2, PP3                                | VUS               | This study                                                                                                                                                                                              |
| 2-233388527-A-AC   | PRSS56 | NM_001195129.1:c.1066dupC   | p.Gln356ProfsTer152 | 0.0003668 (RF)  | 12             | 1                               | NA                                                                                                                                                                                                                                                                          | NA                                                 | Pathogen    | Absent | NA                | Het      | in trans by whatsh               | PVS1, PM2                               | Likely Pathogenic | Siggs et al., 2020; Almoallem et al., 2020                                                                                                                                                              |
| 2-233388527-AC-A   | PRSS56 | NM_001195129.1:c.1066delC   | p.Gln356ArgfsTer148 | 0.00005792 (RF) | 17             | 0                               | NA                                                                                                                                                                                                                                                                          | NA                                                 | Absent      | Absent | NA                | Hom      | NA                               | PVS1, PM2                               | Likely Pathogenic | This study                                                                                                                                                                                              |
| 2-233390055-C-T    | PRSS56 | NM_001195129.1:c.1651C>T    | p.Leu551Phe         | 0.000007895     | 5.5            | 1.5                             | Benign computational verdict because 5 benign predictions from DANN, DEOGEN2, MVP, MutationAssessor and PrimateAI vs 2 pathogenic predictions from FATHMM-MKL and M-CAP and the position is not conserved (GERP++ rejected substitutions = 4.07 is less than 5.5).          | NA                                                 | Absent      | Absent | NA                | Het      | NA                               | PM2                                     | VUS               | This study                                                                                                                                                                                              |

VUS, variant of unknown significance; HGVSc, human genetic variant source cDNA; HGVSp, human genetic variant source protein; gnomAD AF, allele frequency in gnomAD database

Table S2: Clinical features of nanophthalmos and high hyperopia families carrying MFRP, PRSS56, TMEM98 deleterious variants

| Patient #  | Family # | Source | Age at exam | Sex | Ethnicity | Alleles | Gene   | Sporadic/Familial | logMAR VA |        | Phakic Refraction (SE) |       | Refraction Type | Lens status |         | Axial length (mm) |      | Phakic ACD (mm) |      | C/D Ratio |      | Max Clinic IOP |      | Scleral Thickness (mm) |        | Glaucoma | Narrow angle? | Macular phenotype | Choroidal Folds | Pigmentary retinopathy | Drusen | Vascular Tortuosity | Strabismus | Other findings |                  |                      |                              |                      |
|------------|----------|--------|-------------|-----|-----------|---------|--------|-------------------|-----------|--------|------------------------|-------|-----------------|-------------|---------|-------------------|------|-----------------|------|-----------|------|----------------|------|------------------------|--------|----------|---------------|-------------------|-----------------|------------------------|--------|---------------------|------------|----------------|------------------|----------------------|------------------------------|----------------------|
|            |          |        |             |     |           |         |        |                   | OD        | OS     | OD                     | OS    |                 | OD          | OS      | OD                | OS   | OD              | OS   | OD        | OS   | OD             | OS   | OD                     | OS     |          |               |                   |                 |                        |        |                     |            |                | OD               | OS                   |                              |                      |
| P01131     | F1       | UM     | 64          | F   | MIXD      | 2       | MFRP   | Familial          | 1.0       | CF 1   | 12.25                  | 12.25 | Manifest        | Phakic      | Phakic  | 15.8              | 15.9 | NR              | NR   | No view   | 1    | 34             | 16   | ND                     | ND     | +        | NR            | NR                | NR              | NR                     | NR     | NR                  | NR         | -              |                  |                      |                              |                      |
| P01595     | F1       | UM     | 45          | M   | MIXD      | 2       | MFRP   | Familial          | ND        | ND     | 16.13                  | 15.88 | Wearing         | Phakic      | Phakic  | 15.5              | 16.1 | NR              | NR   | NR        | NR   | NR             | NR   | ND                     | ND     | NR       | NR            | NR                | NR              | NR                     | NR     | NR                  | NR         | NR             | -                |                      |                              |                      |
| P01600     | F1       | UM     | 64          | F   | MIXD      | 2       | MFRP   | Familial          | bare HM   | 0.7    | 12.50                  | 11.88 | Wearing         | Pseudo      | Pseudo  | 16.9              | 18.9 | 2.13            | NR   | 0.6       | NR   | 28             | 19   | 2.3                    | 1.8    | +        | +             | -                 | +               | +                      | +      | +                   | +          | +              | Guttata<br>CRVO  |                      |                              |                      |
| P01604     | F1       | UM     | 68          | M   | MIXD      | 2       | MFRP   | Familial          | 0.9       | 0.9    | 15.75                  | 16.13 | Wearing         | Pseudo      | Pseudo  | 15.5              | 15.8 | 1.13            | 1.63 | NR        | NR   | 12             | 18   | 2.3                    | 2.4    | +        | +             | ERM               | +               | +                      | +      | +                   | +          | +              | -                |                      |                              |                      |
| P01605     | F1       | UM     | 77          | M   | MIXD      | 2       | MFRP   | Familial          | 0.7       | 1.0    | 18.50                  | 18.50 | Wearing         | Pseudo      | Pseudo  | 16.0              | 16.5 | 2.44            | 2.21 | 0.3       | 0.3  | 24             | 19   | 2.6                    | 2.7    | +        | +             | -                 | -               | NR                     | NR     | NR                  | NR         | NR             | NR               | -                    |                              |                      |
| P02210     | F2       | UM     | 56          | M   | EUWA      | 2       | MFRP   | Sporadic          | 1.2       | 1.2    | 19.38                  | 24.25 | Manifest        | Phakic      | Phakic  | 13.7              | 13.6 | NR              | NR   | NR        | NR   | 10             | 10   | 2.5                    | 2.3    | -        | NR            | CME               | +               | +                      | +      | +                   | +          | +              | -                |                      |                              |                      |
| P05188     | F3       | UM     | 61          | M   | EUWA      | 2       | MFRP   | Sporadic          | HM        | 0.8    | 11.75                  | 12.25 | NR              | Pseudo      | Pseudo  | 17.7              | 17.2 | NR              | 2.29 | pallor    | 0.2  | 34             | 16   | 2.1                    | 1.8    | -        | +             | -                 | +               | +                      | +      | +                   | +          | +              | ET               |                      |                              |                      |
| P05208     | F4       | UM     | 18          | F   | EUWA      | 2       | MFRP   | Familial          | 0.5       | 0.5    | 17.25                  | 18.25 | Wearing         | Phakic      | Phakic  | 14.5              | 14.4 | NR              | NR   | 0.15      | 0.15 | 18             | 13   | 2.4                    | 2.5    | -        | +             | Retinal folds     | -               | NR                     | +      | +                   | +          | +              | +                | +                    | ET                           |                      |
| P05209     | F4       | UM     | 14          | M   | EUWA      | 2       | MFRP   | Familial          | 0.1       | 0.0    | 15.63                  | 15.75 | Wearing         | Phakic      | Phakic  | 16.3              | 16.1 | NR              | NR   | 0.4       | 0.3  | 18             | 13   | ND                     | ND     | -        | +             | Retinal folds     | -               | NR                     | +      | +                   | +          | +              | +                | -                    |                              |                      |
| D1108-J01  | F5       | NEI    | 32          | F   | EUWA      | 2       | MFRP   | Sporadic          | 0.4       | 0.3    | 8.63                   | 8.38  | Manifest        | Pseudo      | Pseudo  | 19.8              | 19.7 | ND              | ND   | 0         | 0    | 16             | 18   | ND                     | ND     | -        | NR            | CME               | -               | +                      | -      | -                   | -          | -              | optic disc edema |                      |                              |                      |
| P04556     | F6       | UM     | 24          | M   | EUWA      | 1       | MFRP   | Sporadic          | NR        | NR     | 11.13                  | 11.50 | Wearing         | NR          | NR      | 17.2              | 17.1 | NR              | NR   | 0.5       | 0.3  | 23             | 28   | ND                     | ND     | +        | NR            | Retinal folds     | +               | -                      | +      | +                   | NR         | NR             | NR               | -                    |                              |                      |
| P05050     | F7       | UM     | 59          | F   | EUWA      | 1       | MFRP   | Sporadic          | 0         | 0.0969 | 1.25                   | 1.88  | Wearing         | Pseudo      | Pseudo  | 19.9              | 19.3 | 2.32            | 3.82 | 0.2       | 0.1  | 15             | 17   | 2.4                    | ND     | +        | +             | CME, ERM          | -               | -                      | +      | +                   | +          | +              | +                | aqueous misdirection |                              |                      |
| P02228     | F9       | UM     | 55          | M   | EUWA      | 2       | PRSS56 | Familial          | 0.6       | 0.6    | 10.75                  | 9.38  | Wearing         | Phakic      | Phakic  | NR                | 17.5 | NR              | NR   | NR        | 0.8  | 38             | 36   | +thick                 | +thick | +        | NR            | NR                | +               | +                      | NR     | NR                  | NR         | NR             | NR               | aqueous misdirection |                              |                      |
| P02239     | F9       | UM     | 70          | F   | EUWA      | 2       | PRSS56 | Familial          | 1.0       | 0.5    | 13.50                  | 13.50 | Wearing         | Phakic      | Phakic  | 17.1              | 17.4 | 2.62            | 2.62 | 0.1       | 0.1  | 18             | 18   | 2.1                    | +thick | -        | +             | -                 | +               | NR                     | -      | -                   | -          | -              | -                | ptosis               |                              |                      |
| P02302     | F9       | UM     | 65          | F   | MIXD      | 2       | PRSS56 | Familial          | 1.0       | 0.4    | 10.50                  | 11.00 | Wearing         | Pseudo      | Pseudo  | 17.5              | 17.5 | NR              | NR   | NR        | NR   | 23             | 12   | +thick                 | +thick | +        | +             | +                 | +               | +                      | +      | +                   | +          | +              | -                |                      |                              |                      |
| MISC0005-1 | F10      | NEI    | 46          | M   | EUWA      | 2       | PRSS56 | Familial          | 0.3       | 0.5    | 17.75                  | 16.75 | Manifest        | Phakic      | Phakic  | 15.4              | 16.2 | NR              | NR   | 0.2       | 0.2  | 16             | 16   | ND                     | ND     | -        | +             | ND                | ND              | -                      | ND     | -                   | ND         | -              | -                | -                    | -                            |                      |
| MISC0005-2 | F10      | NEI    | 40          | F   | EUWA      | 2       | PRSS56 | Familial          | 0.5       | 0.5    | 14.63                  | 14.13 | Manifest        | Phakic      | Phakic  | 16.7              | 16.6 | NR              | NR   | 0.1       | 0    | 15             | 15   | ND                     | ND     | -        | +             | -                 | +               | +                      | +      | +                   | +          | +              | +                | -                    |                              |                      |
| MISC0005-3 | F10      | NEI    | 16          | F   | EUWA      | 2       | PRSS56 | Familial          | 0.4       | CF 6   | 13.00                  | 13.63 | wearing         | Phakic      | Phakic  | 15.7              | 15.1 | NR              | NR   | 0         | 0    | 16             | 16   | ND                     | ND     | -        | +             | ERM               | ND              | -                      | +      | +                   | +          | +              | +                | +                    | ET                           |                      |
| PM827      | F11      | UM     | 61          | M   | EUWA      | 2       | PRSS56 | Familial          | 0.5       | NLP    | 25.00                  | 25.00 | Wearing         | Aphakic     | Aphakic | 15.7              | 18.3 | NR              | NR   | 0.1       | NR   | 15             | 16   | +thick                 | +thick | +        | +             | Retinoschisis     | +               | +                      | +      | +                   | +          | +              | +                | -                    | retinal detachment, ptosis   |                      |
| P02206     | F12      | UM     | 75          | M   | EUWA      | 2       | PRSS56 | Sporadic          | 0.3       | 0.3    | 15.00                  | 14.25 | Wearing         | Phakic      | Phakic  | 16.0              | 15.8 | NR              | 2.07 | 0.7       | 0.95 | 30             | 34   | 2                      | +thick | +        | +             | Retinoschisis     | +               | +                      | +      | +                   | +          | +              | +                | +                    | ET                           | aqueous misdirection |
| P05214     | F12      | UM     | 61          | F   | EUWA      | 1       | PRSS56 | Sporadic          | 1.1       | 0.1    | NR                     | NR    | NR              | Pseudo      | Pseudo  | 19.6              | 19.9 | 1.4             | 2.53 | 0.15      | NR   | 68             | 10   | 2.9                    | 2.9    | +        | +             | -                 | +               | +                      | +      | +                   | +          | +              | +                | XT                   | aqueous misdirection, ptosis |                      |
| P02367     | F13      | UM     | 85          | M   | EUWA      | 1       | PRSS56 | Sporadic          | 1.0       | 0.2    | 2.88                   | 2.25  | Manifest        | Pseudo      | Pseudo  | 20.6              | 20.9 | NR              | NR   | 0.95      | 0.75 | 42             | 20   | +thick                 | +thick | +        | +             | NR                | NR              | NR                     | NR     | NR                  | NR         | NR             | NR               | NR                   | CRVO, NVG                    |                      |
| P01811     | F14      | UM     | 60          | F   | EUWA      | 1       | TMEM98 | Familial          | 0.3       | 0.6    | NR                     | NR    | NR              | Pseudo      | Pseudo  | 17.3              | 17.3 | NR              | 2.13 | 0.85      | 0.2  | 35             | NR   | +thick                 | +thick | +        | +             | -                 | +               | +                      | +      | +                   | +          | +              | -                |                      |                              |                      |
| P01963     | F14      | UM     | 30          | F   | EUWA      | 1       | TMEM98 | Familial          | 0.1       | 0.1    | 9.8                    | 10.3  | Wearing         | Phakic      | Phakic  | NR                | NR   | NR              | NR   | 0.2       | 0.2  | 16             | 16   | ND                     | ND     | NR       | NR            | NR                | NR              | NR                     | NR     | NR                  | NR         | NR             | NR               | NR                   | NR                           |                      |
| P02232     | F14      | UM     | 57          | F   | EUWA      | 1       | TMEM98 | Familial          | 0.6       | 0.4    | 10.6                   | 10.0  | Wearing         | Pseudo      | Pseudo  | NR                | NR   | NR              | NR   | NR        | 0.95 | 0.95           | 35.8 | 35.8                   | ND     | ND       | +             | +                 | NR              | NR                     | NR     | NR                  | NR         | NR             | NR               | NR                   | NR                           |                      |
| P02233     | F14      | UM     | 84          | F   | EUWA      | 1       | TMEM98 | Familial          | CF        | 0.6    | 8.9                    | 8.9   | Wearing         | Pseudo      | Pseudo  | NR                | NR   | NR              | NR   | 0.3       | 0.4  | 13             | 10   | ND                     | ND     | NR       | NR            | NR                | NR              | NR                     | NR     | NR                  | NR         | NR             | NR               | NR                   | NR                           |                      |

SE, spherical equivalent, ACD, anterior chamber depth, C/D cup-to-disc; IOP, intraocular pressure; logMAR VA, log minimal angle of resolution visual acuity; OD, right; OS, left; NR, not recorded, ND, not determined; EUWA, European white; MIXD, mixed race; NEI, National Eye Institute; UM, University of Michigan; ERM, epiretinal membrane; CME, cystoid macular edema; ET, esotropia; XT, exotropia; CRVO, central retinal vein occlusion; NVG, neovascular glaucoma
